# Supplementary material
Source: Springer Nature journal article supplement (https://www.springermedizin.de/resource/supplementary/13054_2010_9332_MOESM6_ESM.pdf/9705946)
Supplement: MOESM6 [file 9705946]

|                                      | <i>AIS head&lt;3</i> |            |        | <i>AIS head≥3</i> |            |        |
|--------------------------------------|----------------------|------------|--------|-------------------|------------|--------|
|                                      | FFP:pRBC             | FFP:pRBC   | p      | FFP:pRBC          | FFP:pRBC   | p      |
|                                      | ≤1:2                 | >1:2       |        | ≤1:2              | >1:2       |        |
| Sepsis (n, %)                        | 31 (21.5)            | 91 (23.6)  | 0.608  | 19 (15.7)         | 98 (24.9)  | 0.035  |
| Multi organ failure (n, %)           | 86 (58.5)            | 211 (55.7) | 0.557  | 80 (67.2)         | 276 (71.3) | 0.393  |
| Ventilator-free days (days, mean±SD) | 8.7±11.2             | 12.8±11.6  | <0.001 | 4.3±8.1           | 6.1±9.0    | 0.006  |
| Survivors vent.-free days            | 16.9±10.2            | 17.4±10.1  | 0.647  | 11.5±9.6          | 11.1±9.7   | 0.825  |
| ICU LOS (days, mean±SD)              | 14.7±19.4            | 18.5±20.1  | <0.001 | 12.5±18.5         | 18.2±21.3  | <0.001 |
| Survivors ICU LOS                    | 24.7±20.5            | 23.1±20.6  | 0.335  | 29.0±20.8         | 29.7±22.3  | 0.703  |
| Hospital LOS (days, mean±SD)         | 30.2±40.3            | 43.3±40.2  | <0.001 | 20.6±30.1         | 29.9±36.4  | <0.001 |
| Survivors HLOS                       | 54.3±43.0            | 56.3±38.5  | 0.361  | 49.2±32.3         | 49.9±36.8  | 0.934  |
| 6h mortality (n, %)                  | 74 (34.9)            | 45 (10.6)  | <0.001 | 55 (32.9)         | 69 (15.5)  | <0.001 |
| 24h mortality (n, %)                 | 85 (40.1)            | 47 (17.4)  | <0.001 | 74 (44.3)         | 110 (24.7) | <0.001 |
| 30d mortality (n, %)                 | 97 (45.8)            | 105 (24.6) | <0.001 | 104 (62.3)        | 199 (44.7) | <0.001 |
| In hospital mortality overall (n, %) | 102 (48.1)           | 114 (26.8) | <0.001 | 104 (62.3)        | 203 (45.6) | <0.001 |
